# Supplementary material for: Classification of polyhedral shapes from individual anisotropically resolved cryo-electron tomography reconstructions
Source: PubMed Central journal article supplement (PMC4904361; doi:10.1186/s12859-016-1107-5), 2016-06-13

# 2D view of complete tomograms

Tomogram 05

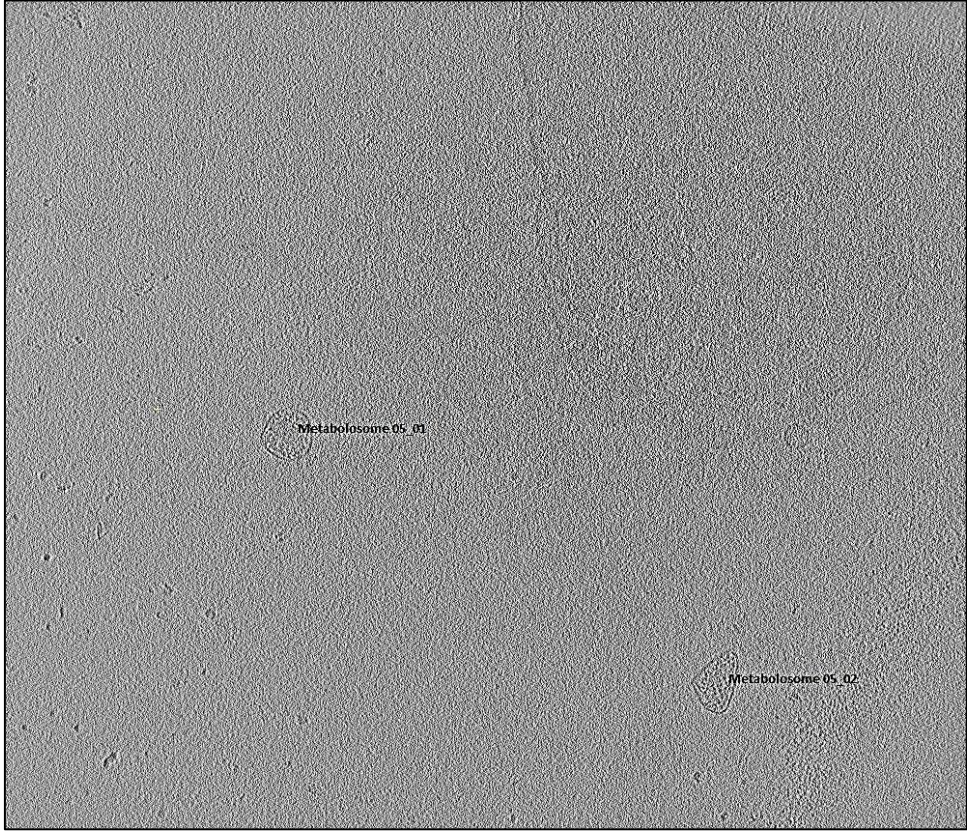

Tomogram 13 (View 1)

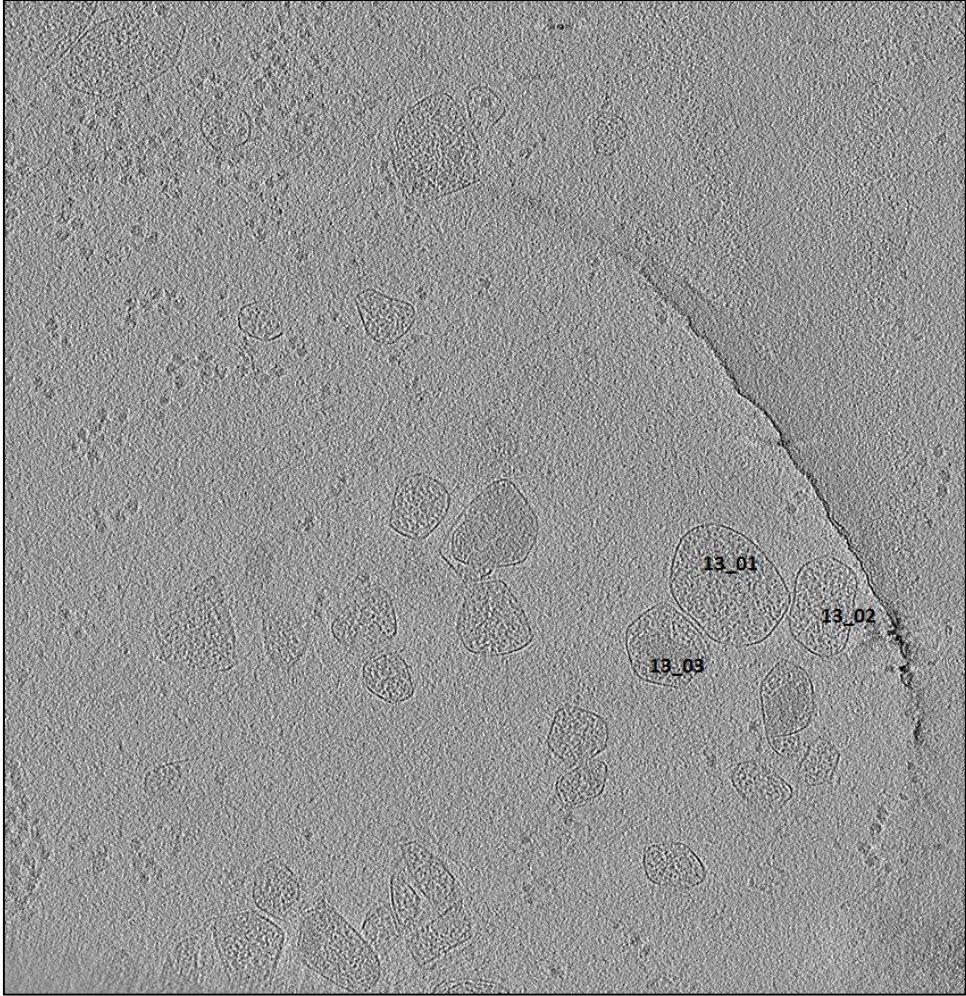

Tomogram 13 (View 2)

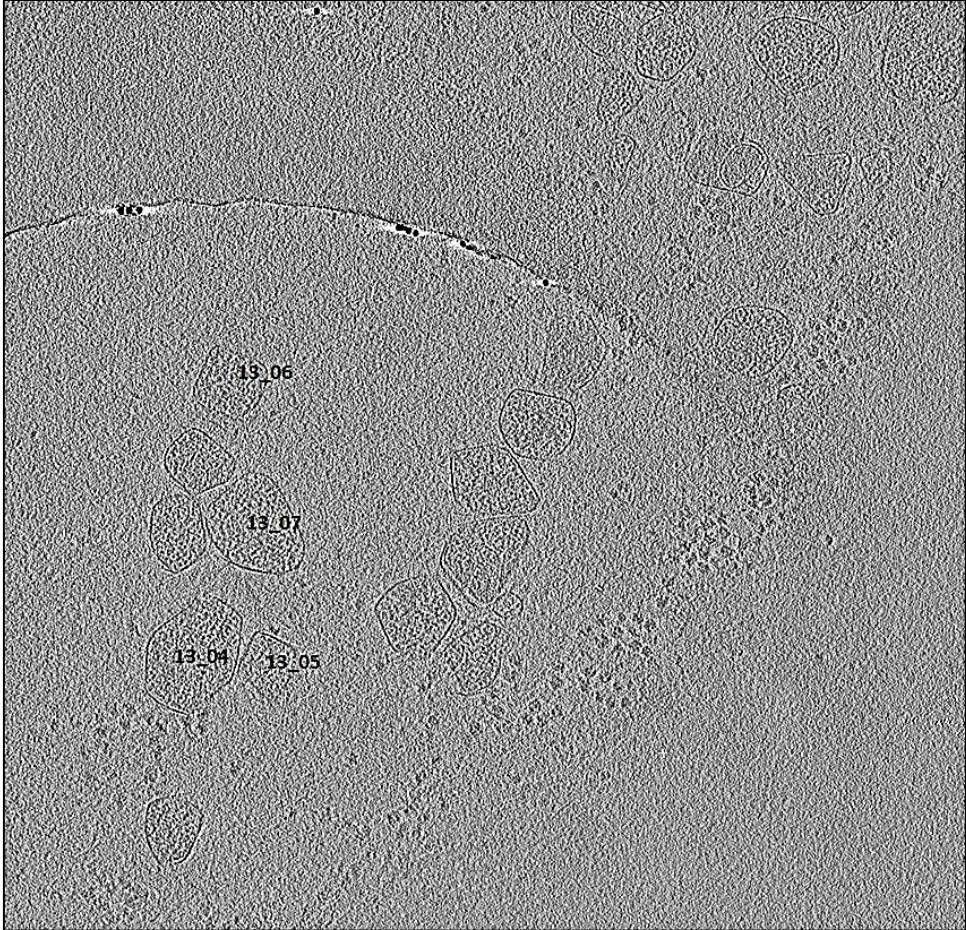

Tomogram 13 (View 3)

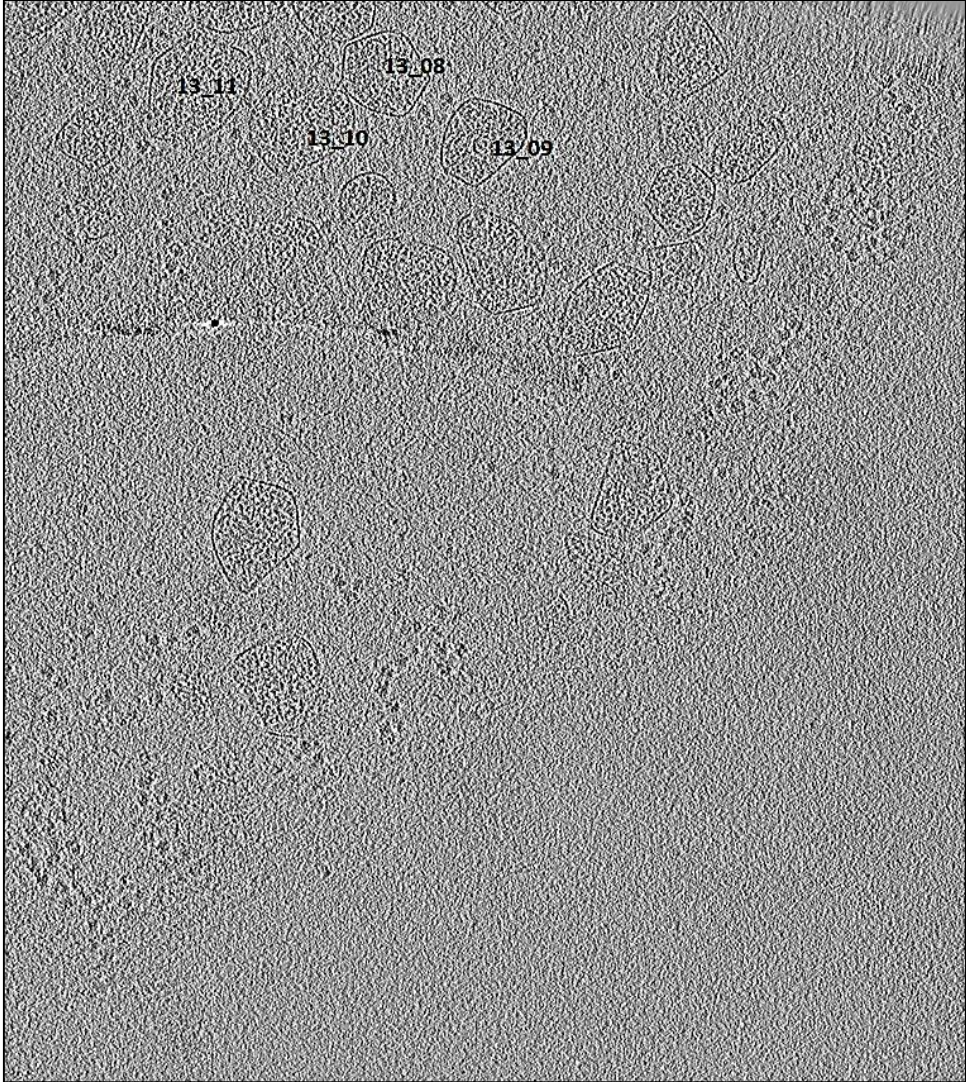

Tomogram 13 (View 4)

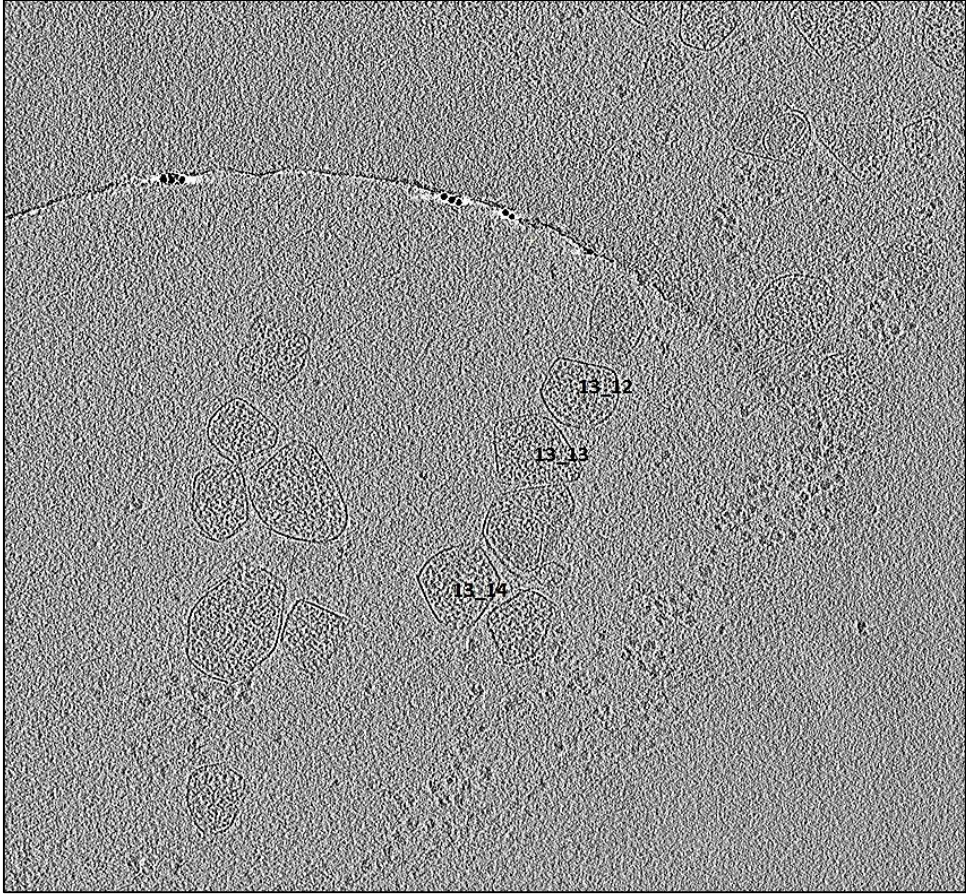

Tomogram 20 (View 1)

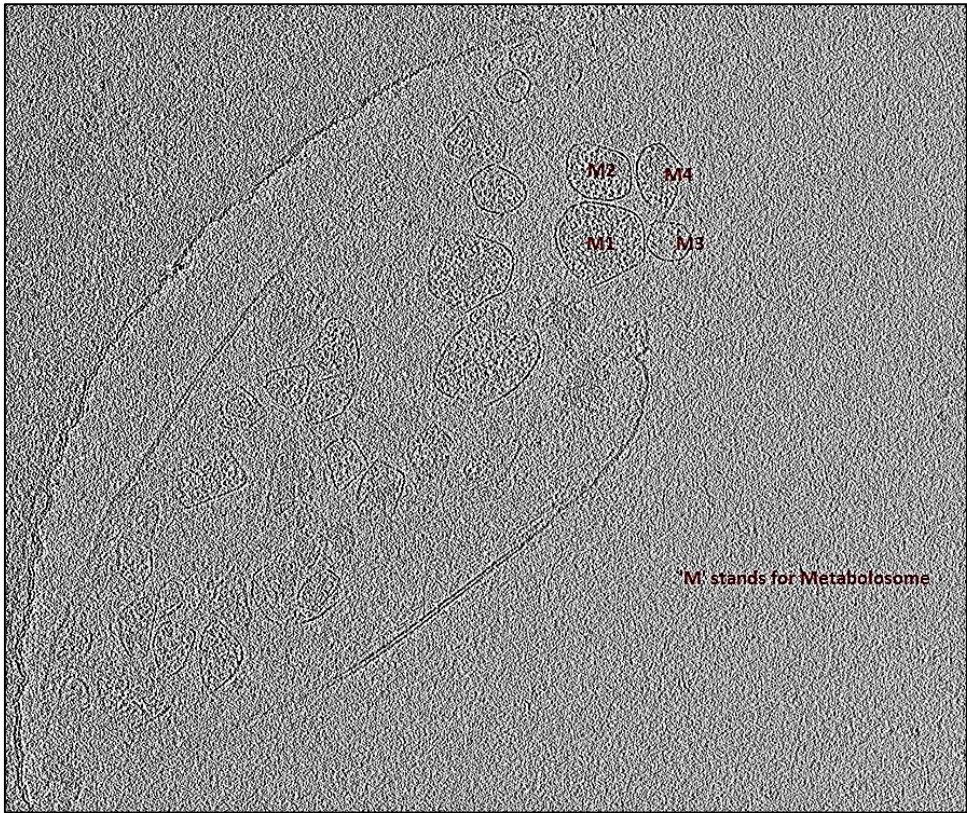

Tomogram 20 (View 2)

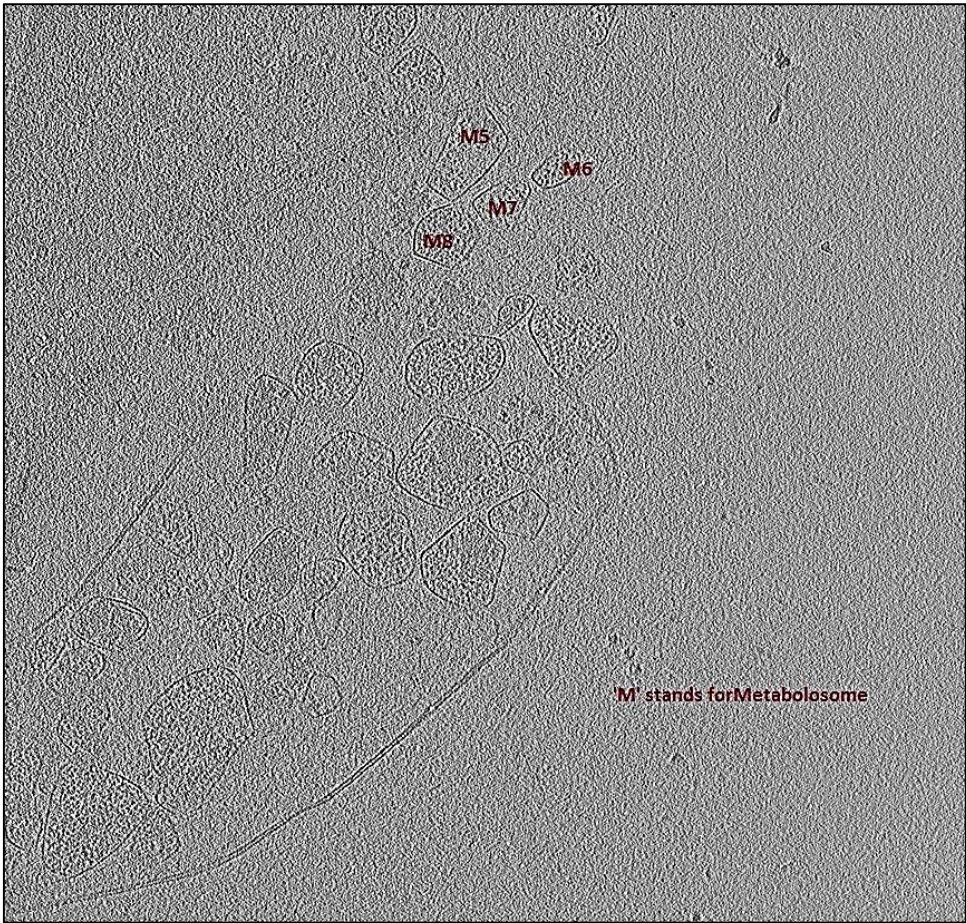

Tomogram 20 (View 3)

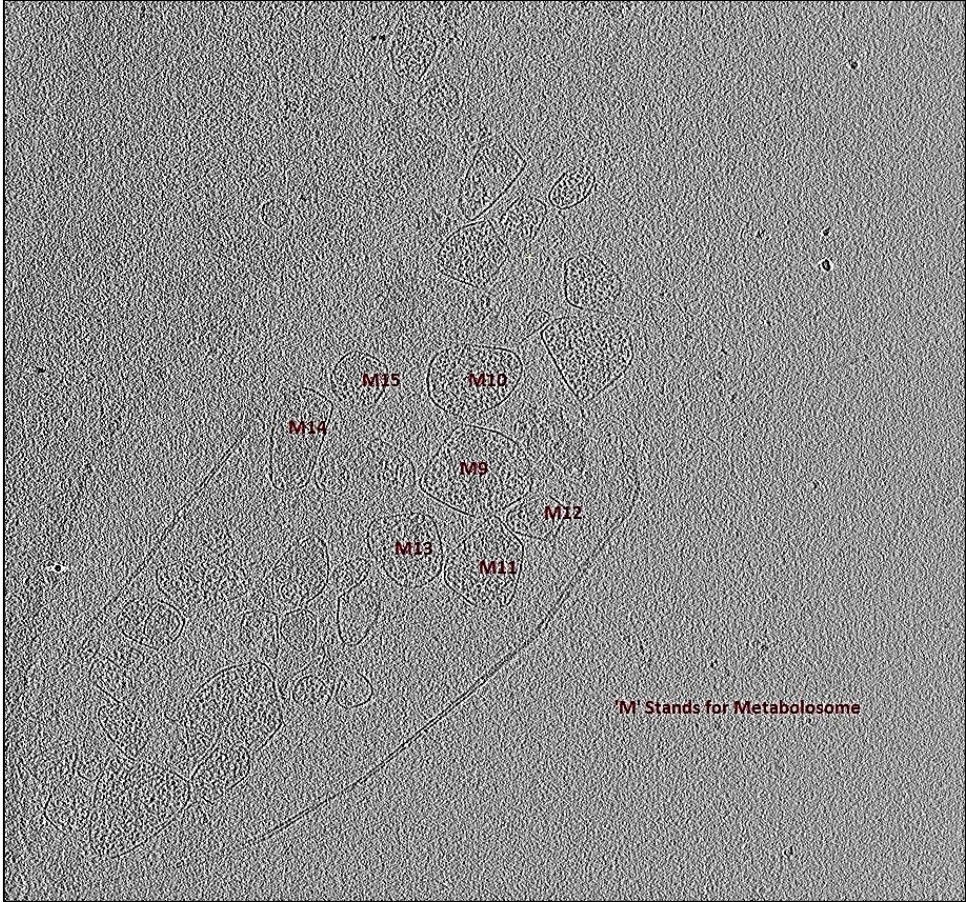



Tomogram 34 (View 1)

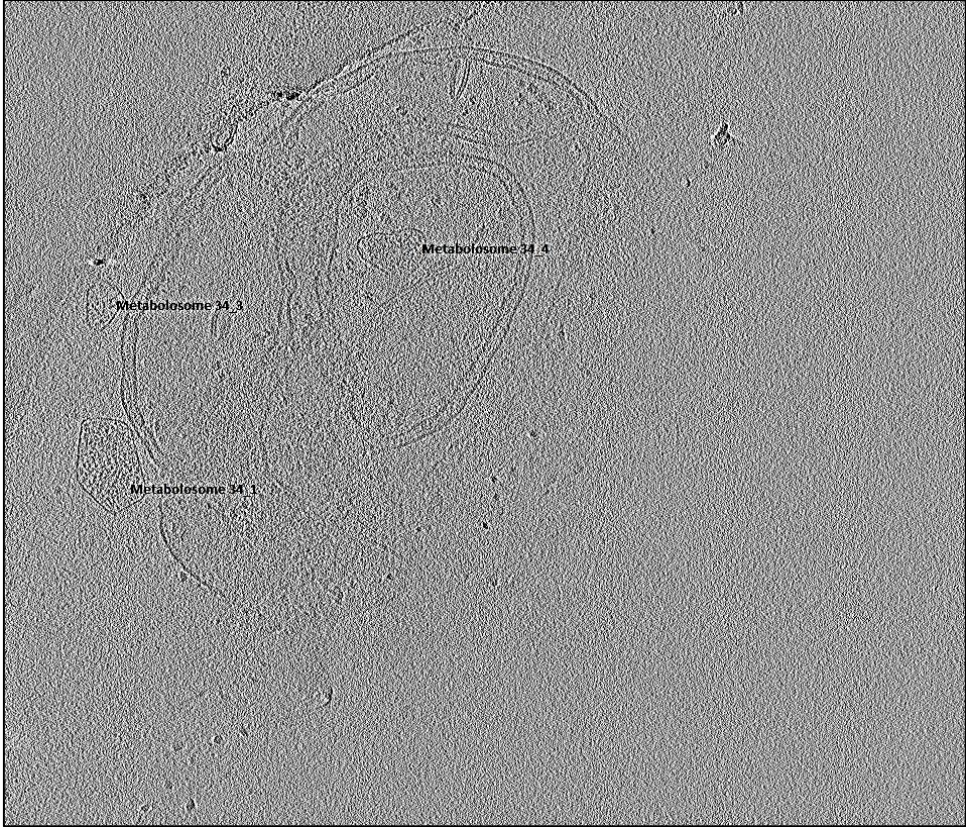

Tomogram 34 (View 2)

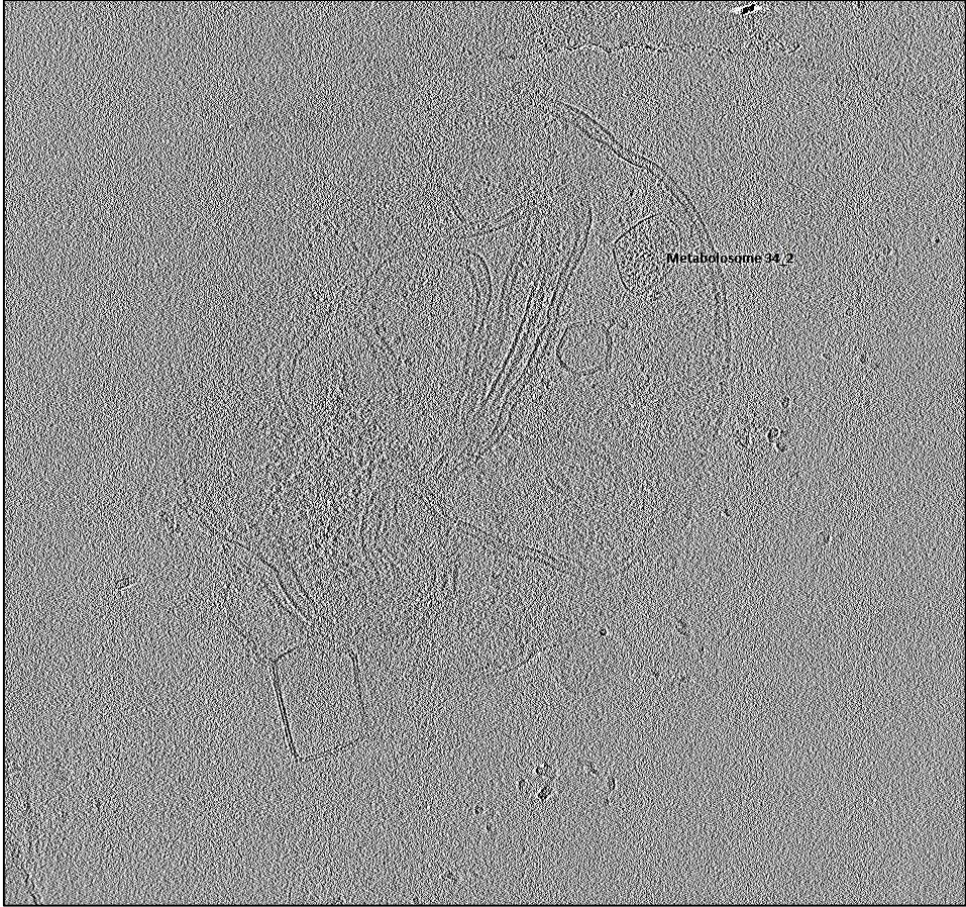

Tomogram 41

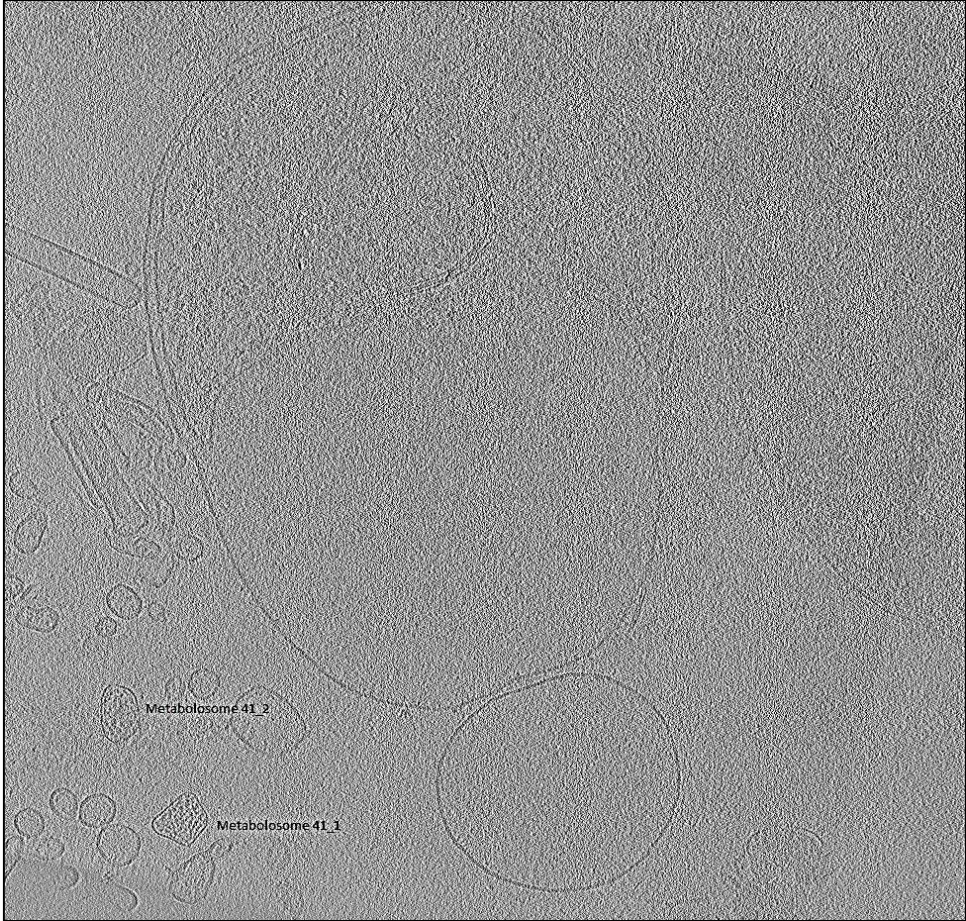

Supplement: 12859_2016_1107_MOESM4_ESM.pdf [file 12859_2016_1107_MOESM4_ESM.pdf]
